# Supplementary material for: LACCASE14 is required for the deposition of guaiacyl lignin and affects cell wall digestibility in poplar
Source: PubMed Central journal article supplement (PMC7713150; doi:10.1186/s13068-020-01843-4), 2020-12-03
Supplement: 13068_2020_1843_MOESM1_ESM.pdf [file 13068_2020_1843_MOESM1_ESM.pdf]

**Table S1. Gene-specific primers used for PCR amplification.**

| <b>Name</b>      | <b>Purpose</b>             | <b>Forward primer (5'-3')</b>  | <b>Reverse primer (5'-3')</b>   |
|------------------|----------------------------|--------------------------------|---------------------------------|
| <i>FOX</i>       | FOX insertion gene cloning | TTTTACGACTCAATGACAAGA          | CGATGGGGGTGTTCTGCTGGT           |
| <i>PtoLAC14</i>  | Gene cloning               | CGGGATCCATGGAGTACGCTTGCTGGCTCC | CGGGATCCTCAACATTTTGGAAAGGTCGCTT |
|                  | Cas9-Target1               | GTCACCCTGCTTTGGTCCAGTGCA       | AAACTGCACTGGACCAAAGCAGGG        |
|                  | Cas9-Target2               | GTCAGCGTTTAGGCAAGACAACCA       | AAACTGGTTGTCTTGCCTAAACGC        |
|                  | Cas9-Seq                   | GGCGATATGGAGTACGCTTG           | ATTCAGCTAATAACAACAACC           |
|                  | Q-PCR                      | TGCCTCTTCCCTGCTTTGGTCC         | GCCATTGACGGTAACAATCGGC          |
| <i>Hyg</i>       | PCR                        | ATCGGACGATTGCGTCGCATC          | GTGTCACGTTGCAAGACCTG            |
| <i>PtoUBQ</i>    | Q-PCR                      | GTTGATTTTTGCTGGGAAGC           | GATCTTGGCCTTCACGTTGT            |
| <i>ProAtLAC4</i> | Promoter cloning           | ACTGAGCTCACCATAGTTTTTCATTGGAC  | ATACCATGGCTCCCTCTCTATCTTTCTC    |
| <i>AtGAPDH</i>   | Q-PCR                      | GCAACATACGACGAAATCAAGAA        | CGACACGAGAACTGTAACCCC           |

**Table S2. Information of related genes.**

| <b>No.</b> | <b>Genes</b>    | <b>Accessions</b>         | <b>Sequence identity to PtrLAC14</b> | <b>References</b>             |
|------------|-----------------|---------------------------|--------------------------------------|-------------------------------|
| 1          | <i>PtrLAC2</i>  | <i>Potri.001G184300.1</i> | 61.24                                | Bryan <i>et al.</i> , 2016    |
| 2          | <i>PtrLAC3</i>  | <i>Potri.001G206200.1</i> | 67.26                                | Bryan <i>et al.</i> , 2016    |
| 3          | <i>PtrLAC14</i> | <i>Potri.006G096900.1</i> | 100                                  | Lu <i>et al.</i> , 2013       |
| 4          | <i>AtLac4</i>   | <i>AT2G38080.1</i>        | 75.85                                | Berthet <i>et al.</i> , 2011  |
| 5          | <i>AtLac17</i>  | <i>AT5G60020.1</i>        | 55.88                                | Berthet <i>et al.</i> , 2011  |
| 6          | <i>SofLAC</i>   | <i>SCVPRZ3027A08.g</i>    | 57.54                                | Cesarino <i>et al.</i> , 2013 |
| 7          | <i>BdLAC5</i>   | <i>Bradi1g66720.1</i>     | 56.99                                | Wang <i>et al.</i> , 2015     |

Ptr: *P. trichocarpa*, At: *A. thaliana*, Sof: *Saccharum officinarum*,  
Bd: *Brachypodium distachyon*.

**Table S3. Cell wall composition (% dry matter) of raw material.**

| <b>Samples</b> | <b>Cellulose</b> | <b>Hemicelluloses</b> | <b>Lignin</b> |
|----------------|------------------|-----------------------|---------------|
| <b>WT1</b>     | 36.73 ± 0.91     | 22.16 ± 0.08          | 23.70 ± 0.83  |
| <b>OE-L1</b>   | 36.62 ± 0.55     | 22.30 ± 0.03          | 26.52 ± 0.87  |
| <b>OE-L2</b>   | 36.95 ± 0.59     | 22.30 ± 0.31          | 26.32 ± 0.76  |
| <b>OE-L5</b>   | 37.07 ± 1.14     | 22.33 ± 0.41          | 27.35 ± 0.66  |
| <b>WT2</b>     | 37.79 ± 0.69     | 22.30 ± 0.25          | 22.39 ± 0.24  |
| <b>KO-L1</b>   | 36.73 ± 0.91     | 22.33 ± 0.41          | 20.88 ± 0.23  |
| <b>KO-L3</b>   | 36.90 ± 0.99     | 23.30 ± 0.31          | 20.72 ± 0.11  |

**Table S4. Lignin composition of raw material.**

| <b>Samples</b> | <b>Lignin monolignols<br/>(<math>\mu\text{mol/g biomass}</math>)</b> |                |                | <b>Lignin monolignols<br/>(% total)</b> |          |          |
|----------------|----------------------------------------------------------------------|----------------|----------------|-----------------------------------------|----------|----------|
|                | <b>G</b>                                                             | <b>S</b>       | <b>H</b>       | <b>G</b>                                | <b>S</b> | <b>H</b> |
| <b>WT1</b>     | 143.42 $\pm$ 3                                                       | 203.45 $\pm$ 8 | 1.44 $\pm$ 0.1 | 41.18                                   | 58.41    | 0.41     |
| <b>OE-L1</b>   | 160.05 $\pm$ 4                                                       | 195.28 $\pm$ 5 | 1.64 $\pm$ 0.1 | 44.84                                   | 54.71    | 0.46     |
| <b>OE-L2</b>   | 165.01 $\pm$ 5                                                       | 203.48 $\pm$ 8 | 2.46 $\pm$ 0.2 | 44.48                                   | 54.86    | 0.66     |
| <b>OE-L5</b>   | 165.27 $\pm$ 7                                                       | 198.55 $\pm$ 6 | 1.81 $\pm$ 0.1 | 45.20                                   | 54.30    | 0.50     |
| <b>WT2</b>     | 172.24 $\pm$ 6                                                       | 206.20 $\pm$ 4 | 2.40 $\pm$ 0.2 | 45.23                                   | 54.14    | 0.63     |
| <b>KO-L1</b>   | 154.64 $\pm$ 5                                                       | 207.97 $\pm$ 5 | 2.41 $\pm$ 0.2 | 42.36                                   | 56.97    | 0.66     |
| <b>KO-L3</b>   | 155.20 $\pm$ 5                                                       | 210.82 $\pm$ 6 | 2.71 $\pm$ 0.3 | 42.09                                   | 57.17    | 0.74     |

|                      |                                                                                                                     |     |
|----------------------|---------------------------------------------------------------------------------------------------------------------|-----|
| PtoLAC14             | .MEYACWLRFMFLAVCIFFPAIVQC.RVREYKFNVMKNTTRLCSSRFIVT..VNGRFPGPTLYAREDDIVLVKVVNVKYNVSIHWHGIRQLRGTGWADGPAYITQCPIC.      | 105 |
| PtrLAC2              | .MENYRARAIIILLVIFIFPAIVEC.EVRLYDFRVVLIINTTKLCSTKSIIVT..INGKFPGPPTIYAREGDVNVNIKLTNEVQYVNIHWHGVRQLRGTGWSGDPAYITQCPIC. | 105 |
| PtrLAC3              | .MEYYQAR.TMLLVIFIFPAIVEC.KVRLYDFRVVLIINTTKLCSSKSIPTPTINGKFPGPPTIYAREGDVNVNIRLTNEVQYVNVVHWHGVSSCFGTGWADGPAYITQCPICF. | 107 |
| AtLAC4               | MGSHMVVFTFLVSFFSVFPAESES.MVREYKFNVMKNTTRLCSSKFTVT..VNGRFPGPTIYAREDDILIKVVNVKYNVSIHWHGVRQVIRGTGWADGPAYITQCPIC.       | 106 |
| AtLAC17              | .MALQLLAVSFCVLLLPQCAF.G.ITREYTLTKMNVTRLCSTKSLVS..VNGQFPGPKLIAREGDVILKVVNVQVFNISLHWHGIRQLRGTGWSGADGPAYITQCPIC.       | 104 |
| BdLAC5               | MGAKCLSLVFLGTSLLPQLLAAMTRMYTENVTKKVTRLCNTRAIPT..VNGKFPGPKIVTREGDRVVVKKVNVNKHVNIHWHGVRQLRGTGWSGDPAYITQCPIC.          | 107 |
| SofLAC               | MEAPCLALLLFGTLLVLPQSSHG.ATRYTTFNVTLKVTRLCTTRAIPT..VNGKFPGPKIVTREGDRVVVKKVNVNKHVNDNITIHWHGVRQLRGTGWSGDPAYITQCPIC.    | 106 |
| <b>Signal peptid</b> |                                                                                                                     |     |
| PtoLAC14             | .PGQSYVYNFTLPGQRTLWHAHILWLRATVHGAMVVLPRKGPYPFF.KPEKEVIVVIA..EWWKSDTEAVINEAKSGIAPNVSDAHTINGHPGAVSTCSSCGCFTL          | 211 |
| PtrLAC2              | .PGQSYLYNFTLPGQRTLWHAHISWLRATVHGAIIVLPKRGVYPFF.KPEKEKIIILG..EWWKADVEAVVNOACTGTLPNISDAHTVNGCTGAVFGCPSGCFTL           | 210 |
| PtrLAC3              | TGGQSYLYNFTLPGQRTLWHAHISWLRATVHGAIIVFPKKGVPYPFF.KPEKEKIIILSFTTEWWKADVEAVVNOACTGTLPNISDAHTVNGCTGAVFGCSTSGCFTL        | 215 |
| AtLAC4               | .PGQVYTYNFTLPGQRTLWHAHILWLRATVYGALVILPKRGVYPFF.KPENEKIVLVG..EWWKSDTEAVINEAKSGIAPNVSDSHMINGHPGPVRNCPSCG.YKL          | 211 |
| AtLAC17              | .TGQSYVYNFTLPGQRTLWHAHISWLRSTVYGLIILPKRGVYPFF.KPEKEVEMIFG..EWFNADTEAIRQACTGGGPNVSDAHTINGHPGPLYNCSAKTDFRL            | 210 |
| BdLAC5               | .TGQSYVYNFTLPGQRTLWHAHVSWMRATVYGPVILPKLGVYPFF.KPEKDVIMFG..EWFNVDEAIIAQACTGGGPNVSDAHTINGHPGPLYNCSSTDFKL              | 213 |
| SofLAC               | .TGQSYVYNFTLPGQRTLWHAHVSWMRATVYGPVILPKLGVYPFF.KPEKEVEIIFG..EWFNADTEAIIAQACTGAPNISDAHTINGHPGPLYNCSSTDFKL             | 213 |
| PtoLAC14             | FVKSGETVYLRRLIN..AALNEELFFKIAGHKLVVEVDATVYKPEFTDVTLLIAPGOTTNVLVTTKKN...TGKYLVA..ASPFMFS.FLAVDNNVTAIFLRYSGALA..      | 310 |
| PtrLAC2              | HVESGKTYLLRLIN..AALNDELFFKIAGHNITVVEVDAAVYKPESTDTFIFIPGOTTNALLTAKS...VGKYLMA..VSPFMDT.VVAVDNNVTAIFLRYMKGTTA..       | 309 |
| PtrLAC3              | HVESGKTYLLRIIFTAALNDELFFKIAGHNITVVEVDATVYKPESTDTFIFIPGOTTNALLTAKS...IGKYLIIFTVSPFMDT.VVAVDNNVTAIFLRYNEPLH..         | 318 |
| AtLAC4               | SVENGYTYLLRLVN..AALNEELFFKVAGHIEFTVVEVDAAVYKPEFTDVTLLIAPGOTTNVLLTAKS...AGKYLVT..ASPFMFA.FLAVDNNVTAIFLRYMKGTTA..     | 310 |
| AtLAC17              | FVKKGKTYLLRLIN..AALNDELFFSIANHTVTVVEADAIYVYKPEFTETILLIAPGOTTNVLLKTKSS..YPSASFFMT..ARPYVIG.CCTFDNSTVAGILEVEPPKQTK    | 313 |
| BdLAC5               | KVQEGKWYLLRLIN..AALNDELFFSIANHTLITVDVDASVYKPEFTDVTLLIAPGOTTNVLLHAKPEDEGCQPAHMLL..AREYATSRGCTYDNTVVAVLEYSPPGQ..      | 317 |
| SofLAC               | KVLEKGWYLLRLIN..AALNDELFFSIANHTLITVDVDAAVYKPEFTDVTLLIAPGOTTNVLLRAEPDAGCPAAHMLL..AREYGTGCECTFDNTVVAVLEYPAPGH..       | 317 |
| PtoLAC14             | .....NSPTILTTFEPFNATAVANCFTNSLRSLNSRFF..PAKVPINVDHNLFFTVSLGVNPC...PSCKAGN..GSRVVASINNVTFVMPPTALLQAHFL.NIS           | 402 |
| PtrLAC2              | .....FSPEVLTITPAINATPVITSTFMDLRLSLNSKRK..PANVPITVDHSLMFTIGVGDIPC...ATCVNG...SKAVCAINNIFFMPTTALLQAHYY.SIS            | 399 |
| PtrLAC3              | .....SPHISLTTTPAINATPATSTFMDKLRSLNSKRETYPANVPITVDHILMFTIGVGDIPC...ATCTNG...SKAVADINNVSEFMPPTALLQAHYY.NIS            | 410 |
| AtLAC4               | .....SSPTILTTFEPFNATSIANNFTNSLRSLNSKKY..PALVPITIDHLLFFTVGLGLNAC...PTCKAGN..GSRVVASINNVTFMMPKTALLPAHYF.NTS           | 402 |
| AtLAC17              | GAHSRTSIKNIQLEKPIIPALINDTNEATKESNKLRLSLNSKRE..PANVPINVDKRFVFTVGLGTPNCHKNCCCGPTNTMFAASISNIFMPTKALLQSHYSGSH           | 421 |
| BdLAC5               | .....IKSRPTLFRPTLPVNDTSEAFANYSAKHSRLASSEY..PANVPRRIDRFFFAVGLGTPC...PTHQCNGPTNITKFSASMNNVSEFMPPTALLKAHYDNTA          | 416 |
| SofLAC               | .....IKSLPFRPSLPAINDTAFAANYSARLSRLATPDY..PANVPRGVDRSFFFAVGLGTPC...PANCQCCP.NGSMFTASMNNVSEFMPPTALLQAHYN.NIA          | 414 |
| PtoLAC14             | G..VFTTDFPAKPPHFNYTGT.PEINLCKSGTKVYRLSYNSTVQLVMQDTGIIISPENHEI..HLHGFNFVAVGRCVGNMYPKIDTKKFNLDVPERNTIGVPSGGWVA        | 507 |
| PtrLAC2              | G..VFTTDFPAPPNSEFNYTGNTAINLCTINGTRTFRIANSTVQLVLOGTIIIPESHEF..HLHGFNFVAVGRCVGNMYPKIDTKKFNLDVPERNTISVPTAGWAA          | 505 |
| PtrLAC3              | GFTVFTTDFPAKPPISFNYTGNTAMNLTNGTRAMRLAENSAVQVLOGTIIIPESHEFFTHLHGFNFVAVGRCVGNMYPKIDTKKFNLDVPERNTISVPTAGWIA            | 520 |
| AtLAC4               | G..VFTTDFPKNPPHFNYSGG.SVINMATETGTRVYRLRYNATVQLVQDTGVIPENHEV..HLHGFNFVAVGRCVGNMYPKIDTKKFNLDVPERNTIGVPSGGWVV          | 507 |
| AtLAC17              | G..VWSPKFPWSEPIVEFNYTGT.PENNTNVSNGTINLMLVLENTSYVELVQDTSILGAESEHL..HLHGFNFVAVGRCVGNMYPKIDTKKFNLDVPERNTIGVPSGGWAA     | 526 |
| BdLAC5               | G..VYTDAPFPAFTQHFNYTGT.PENNTNVSNGTKVAVLEYNASVEVVLQDTSILGAESEHL..HLHGFDFVAVGRCVGNMYPKIDTKKFNLDVPERNTIGVPSGGWVA       | 521 |
| SofLAC               | G..VMTTDFPVPLEFNYTGT.PENNTNVSNGTKVVVLQYNTSYVEVVLQDTSILGAESEHL..HLHGFDFVAVGRCVGNMYPKIDTKKFNLDVPERNTIGVPSGGWVA        | 519 |
| PtoLAC14             | IRFRADNPGVWFM..HCHLEVHTTWGLKMAFLVINGRGKRESLLPPPSDLPK                                                                | 557 |
| PtrLAC2              | IRFRADNPGVWEL..HCHLEVHTTWGLKMFVVVINGRGDESLLPPPSDLPN                                                                 | 555 |
| PtrLAC3              | IRFRADNPGVWFLFTHCHLEVHTTWGLKMAFVVVINGRGPNESILPPPSDLPT                                                               | 572 |
| AtLAC4               | IRFRADNPGVWFM..HCHLEVHTTWGLKMAFLVINGRGPNQSILPPPKDLPK                                                                | 557 |
| AtLAC17              | IRFRADNPGVWFM..HCHLEVHTSWGLRMAFLVLDGCKPKDQKLLPPPADLPK                                                               | 576 |
| BdLAC5               | IRFRADNPGVWFM..HCHLEVHTSWGLKMAVVDGELPKDQKLMPPPSDLPK                                                                 | 571 |
| SofLAC               | IRFRADNPGVWFM..HCHLEVHTSWGLKMAVVDGELPKDQKLMPPPADLPM                                                                 | 569 |

**Fig. S1 Multiple alignment of *PtoLAC14* with other plant laccase proteins known to be involved in lignification. Ptr: *P. trichocarpa*, At: *A. thaliana*, Sof: *Saccharum officinarum*, Bd: *Brachypodium distachyon*.**

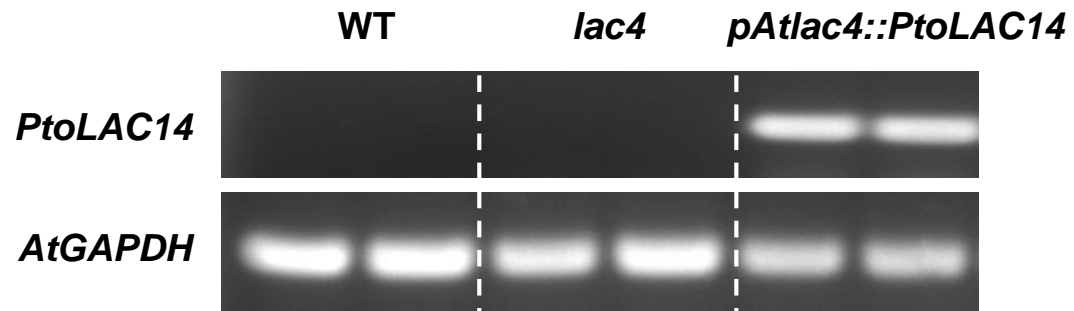

**Fig. S2 Expression of *PtoLAC14*.**

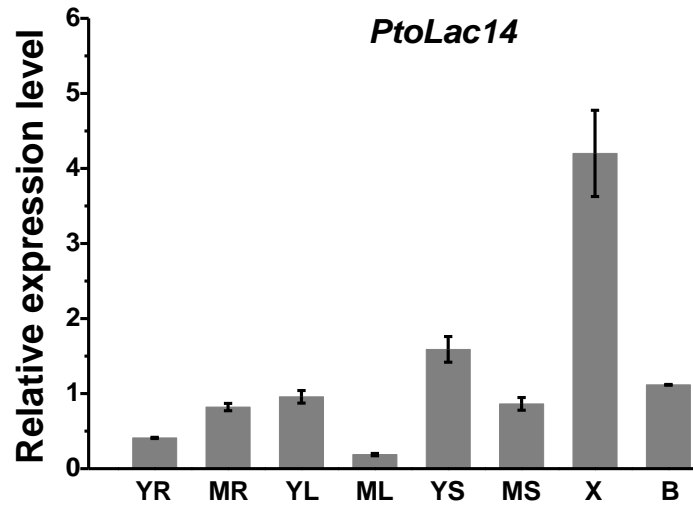

**Fig. S3 The expression profiling of *PtoLAC14* by Q-PCR analysis.**  
YR, young root; MR, mature root; YL, young leaf; YL, ML, mature leaf;  
YS, young stem; MS, mature stem; X, xylem; B, bark.

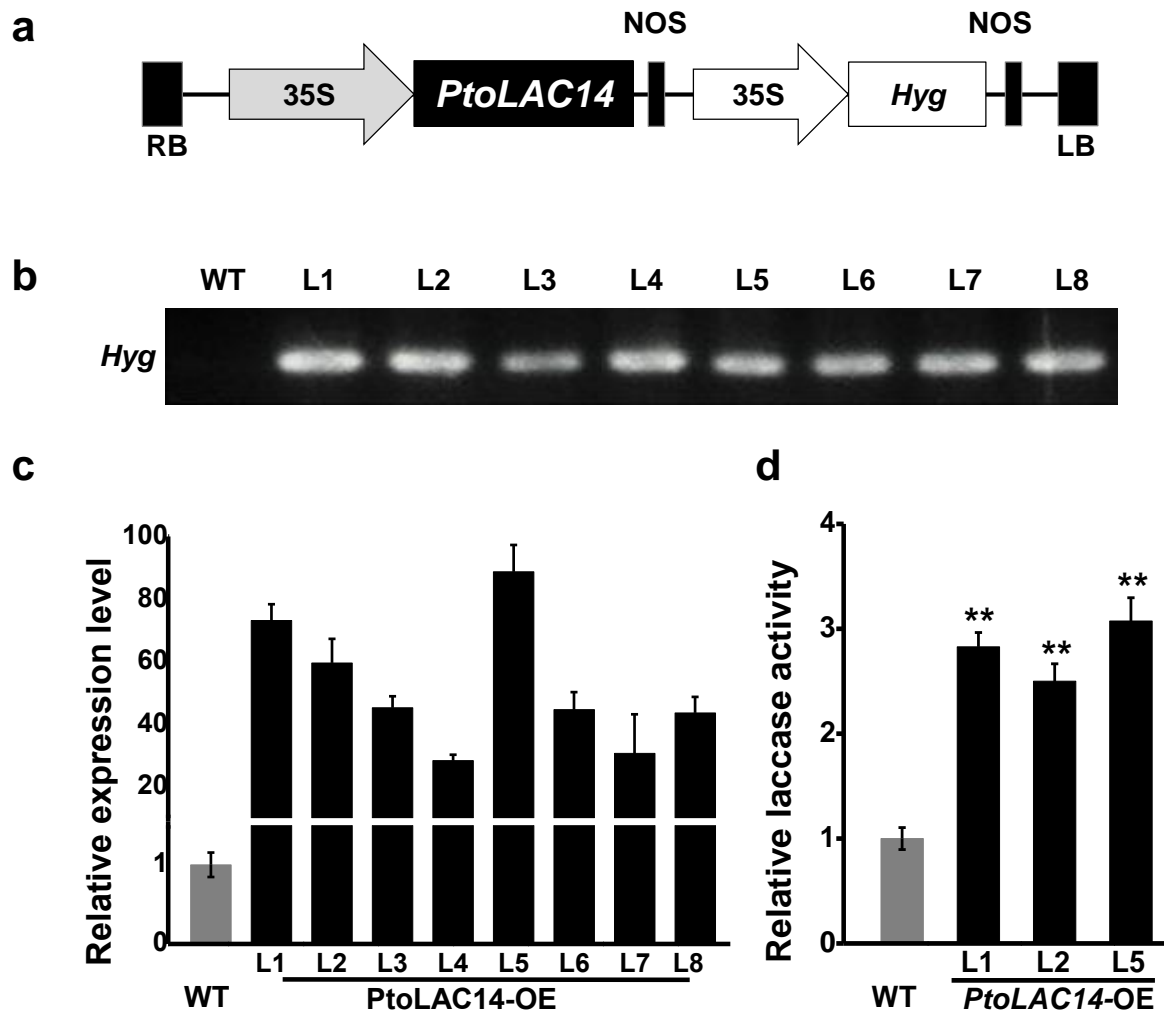

**Fig. S4 Generation of PtoLAC14-OE transgenic poplars.** (a) Diagram of the PtoLAC14-OE vector. (b) The Hyg levels in the PtoLAC14-OE lines. (c) The expression levels of PtoLAC14 in the PtoLAC14-OE lines. The poplar ubiquitin gene was used as an internal control. (d) Quantification of laccase activity with ABTS as the substrate. Data represent mean  $\pm$  SD of three biological replicates. Statistical analyses were performed using Student's *t* test as \*\* $P < 0.01$ .



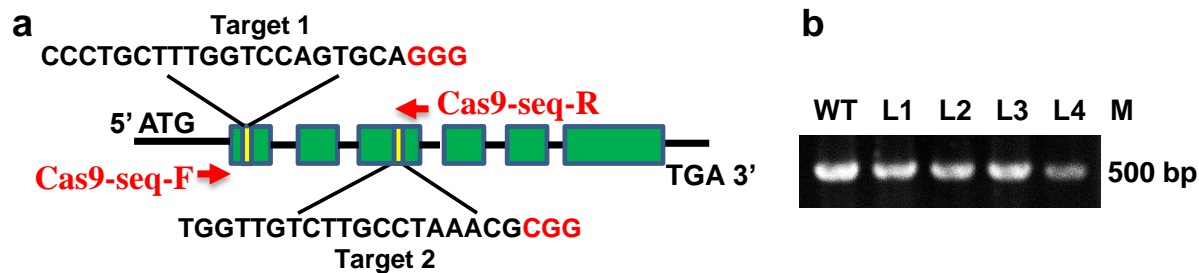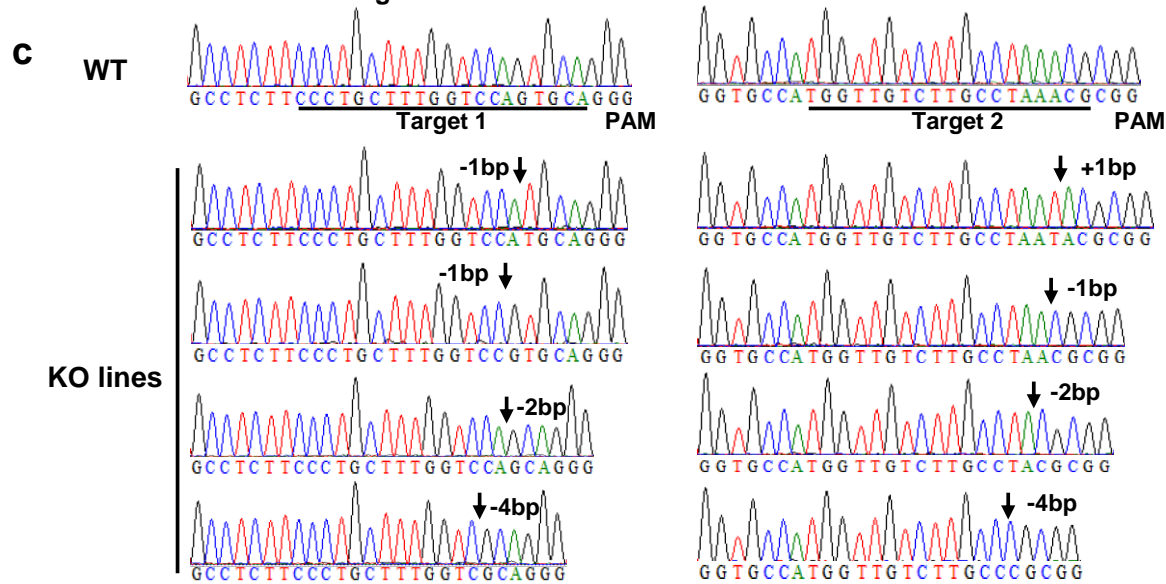

**d**

| Target gene | No. of clones examined | No. of clones with mutations | Mutation rate (%) |
|-------------|------------------------|------------------------------|-------------------|
| PtoLAC14    | 50                     | 42                           | 84                |

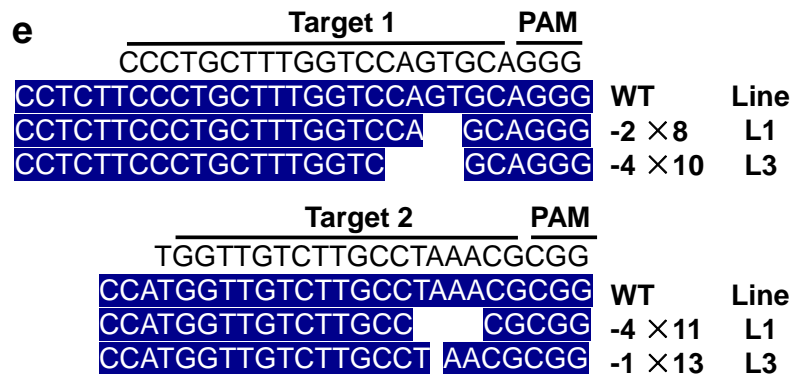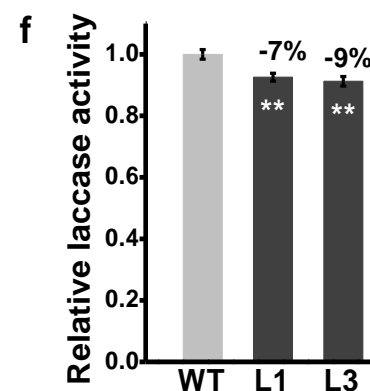

**Fig. S5**  
Collection of  
*PtoLAC14*-  
KO  
transgenic  
poplars.

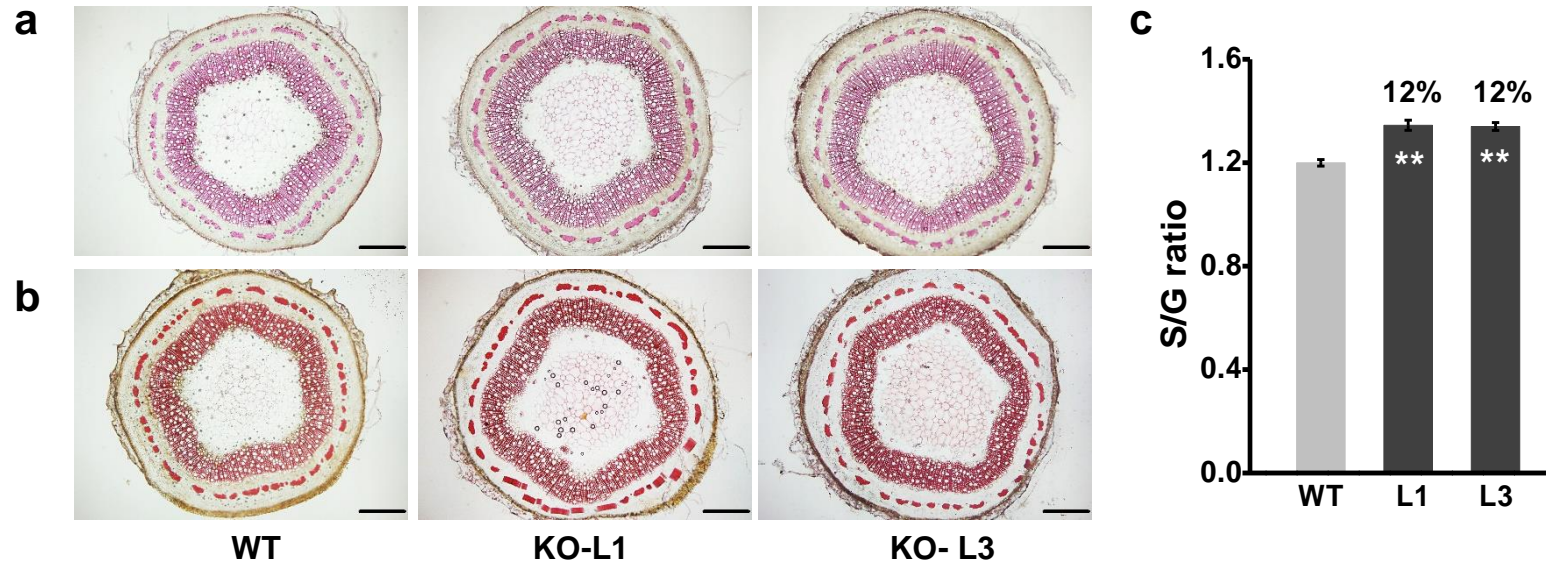

**Fig. S6 Lignin and monomer lignin in *PtoLAC14*-KO transgenic poplar lines.** (a) Phloroglucinol-HCl staining of stem cross sections from WT and *PtoLAC14*-KO lines. Scale bars as 100  $\mu$ m. (b) Histochemical stained with Mäule reagent for lignin monomer composition of stem cross sections from WT and *PtoLAC14*-KO lines. Scale bars as 100  $\mu$ m. (c) The monomer lignin S/G ratio in WT and *PtoLAC14*-KO lines. All data as means  $\pm$  SD (n = 3). Student's *t*-test was performed between the transgenic line and WT as \*\**P* < 0.01.
